# Supplementary material for: Surface Wave Cloak from Graded Refractive Index Nanocomposites
Source: PubMed Central journal article supplement (PMC4945873; doi:10.1038/srep29363), 2016-07-15
Supplement: srep29363-s1.pdf [file srep29363-s1.pdf]

# Surface Wave Cloak from Graded Refractive Index Nanocomposites

## Supplementary Material

L. La Spada<sup>1</sup>, T. M. McManus<sup>1</sup>, H. Dyke<sup>2</sup>, S. Haq<sup>2</sup>, L. Zhang<sup>1</sup>, Q. Cheng<sup>1</sup>, Y. Hao<sup>1</sup>

<sup>1</sup>School of Electronic Engineering and Computer Science, Queen Mary University of London,  
E1 4NS, England, UK

<sup>2</sup>BAE Systems Advanced Technology Centre, BS34 7QW, England, UK

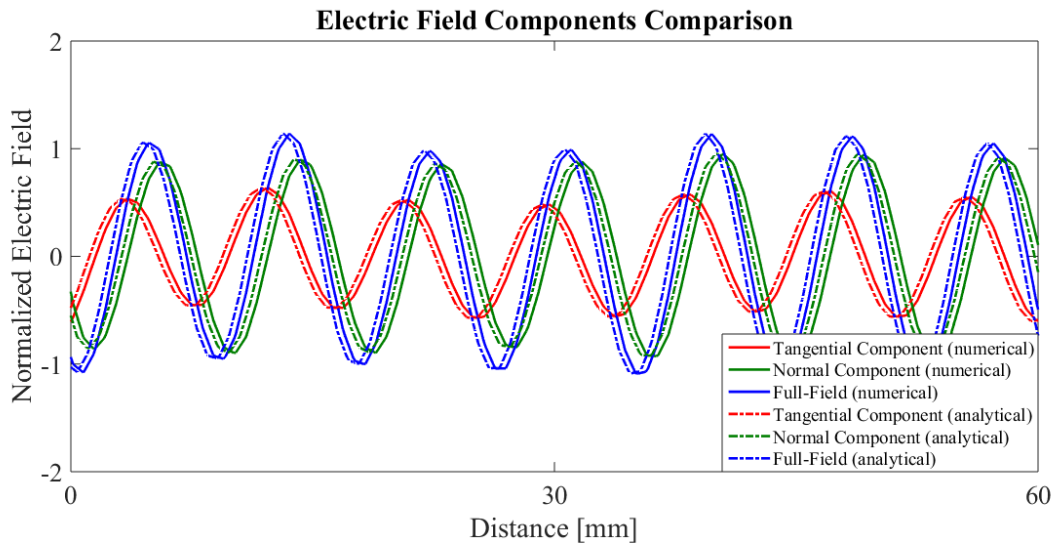

**Figure S1:** Normal and Tangential components comparison (analytical and numerical results) for the Electric Field

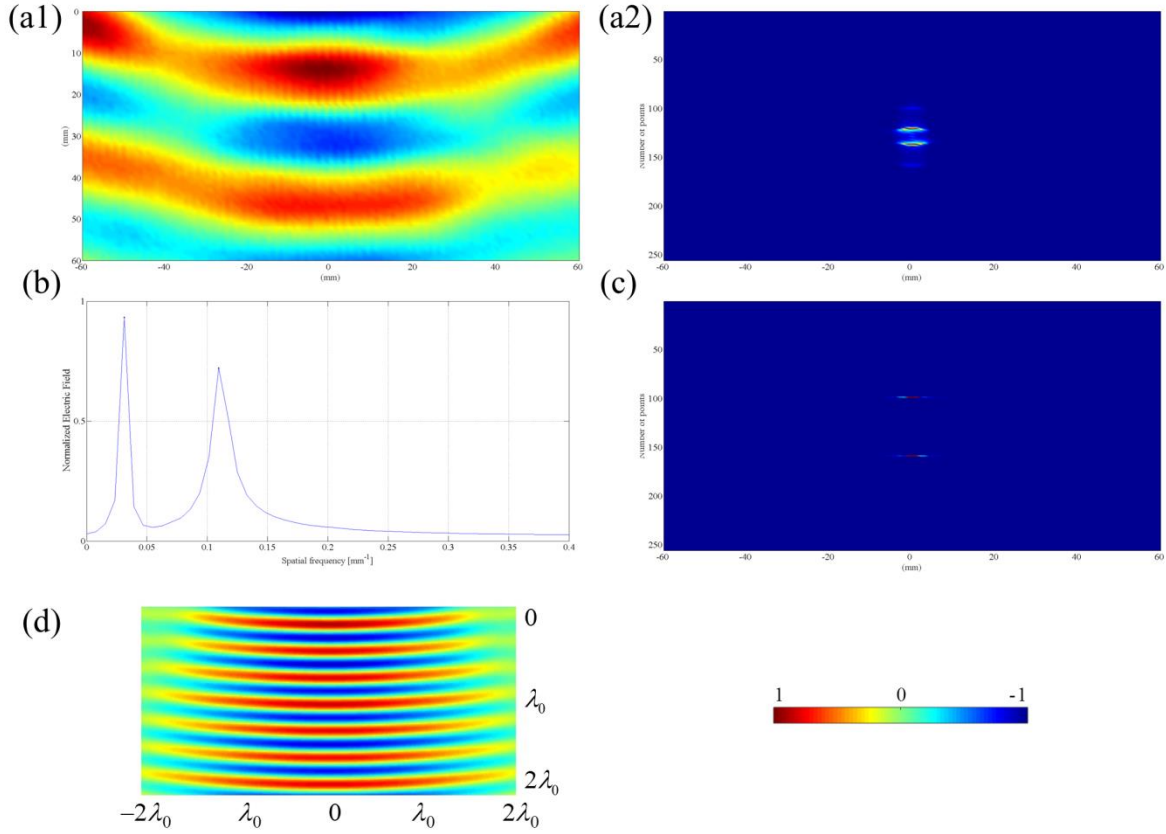

**Figure S2:** Example of FFT procedure for GIS at 10 GHz ( $\lambda_0=30$  mm): (a1) Electric Field Measured (before spectral analysis) and (a2) Electric Field 2D Spatial Frequency Fourier Transform; (b) Spatial Frequency Spectrum; (c) Surface Wave Component 2D Spatial Frequency Fourier Transform and (d) Surface wave conversion in the spatial domain.

| Desired permittivity | Real permittivity | Imaginary permittivity |
|----------------------|-------------------|------------------------|
| 9                    | 8.8               | 0.5                    |
| 10                   | 9.9               | 0.6                    |
| 11                   | 11.1              | 0.7                    |
| 12                   | 12.0              | 0.8                    |
| 13                   | 12.6              | 0.9                    |
| 14                   | 13.7              | 1.0                    |
| 15                   | 13.9              | 1.0                    |

**Table S1:** Desired permittivity and measured values of real permittivity and imaginary permittivity at 10GHz.
